# Supplementary material for: Theoretical study of the substitutional solute effect on the interstitial carbon in nickel-based alloy
Source: Royal Society of Chemistry journal article supplement (doi:10.1039/c7ra01823a), 2017-01-01
Supplement: c7ra01823a1.pdf [file c7ra01823a1.pdf]

## Supplementary information for

### Theoretical study of the substitutional solute effect on the interstitial carbon in nickel-based alloy

Xun Zhang<sup>a,b</sup>, Cui-Lan Ren<sup>a,c,\*</sup>, Han Han<sup>a</sup>, Xiang-Xi Ye<sup>a</sup>, Eugenia Kuo<sup>d</sup>, Cheng-Bin Wang<sup>a,c</sup>, Wei Zhang<sup>a,c</sup>, Li Jiang<sup>a</sup>, Gregory Lumpkin<sup>d</sup>, Ping Huai<sup>a</sup> and Zhi-Yuan Zhu<sup>a,c,\*</sup>

<sup>a</sup> Shanghai Institute of Applied Physics, Chinese Academy of Sciences, Shanghai 201800, China, E-mail: [rencuilan@sinap.ac.cn](mailto:rencuilan@sinap.ac.cn), [zhuzhiyuan@sinap.ac.cn](mailto:zhuzhiyuan@sinap.ac.cn)

<sup>b</sup> University of Chinese Academy of Sciences, Beijing 100049, China

<sup>c</sup> Key Laboratory of Interfacial Physics and Technology, Chinese Academy of Sciences, Shanghai 2018004

<sup>d</sup> Australian Nuclear Science and Technology Organization, Lucas Heights, New South Wales 2234, Australia

**1. Local effect of vacancy on the formation energy of carbon in nickel.**

**Table S1.** The formation energy of carbon in pure nickel and carbon locates at 1-3 NN of vacancy in nickel, unit in eV.

| C in nickel |          | C-V in nickel |     |      |
|-------------|----------|---------------|-----|------|
| Oct site    | Tet site | 1NN           | 2NN | 3NN  |
| 0.74        | 2.44     | –             | –   | –    |
| –           | –        | 0.65          | 0.6 | 0.73 |

## 2. The carbon content effect on their behaviors in nickel.

The C-M binding is expressed by the following equation,  $E_b^C = E_{107M+M+nC} - E_{107ni+N} - n * E_{108Ni+C} + n * E_{108Ni}$ , where  $E_{107M+M+nC}$  is the energy of supercell containing 107 Ni atoms, one M atom and n C atoms,  $E_{107ni+N}$  is the energy of supercell containing 107 Ni atoms and one M atom,  $E_{108Ni+C}$  is the energy of supercell containing 108 Ni atoms and single carbon atom,  $E_{108Ni}$  is the energy of defect-free nickel supercell with 108 Ni atoms, and  $n$  is the number of carbon atom.

**Table S2.** The formation energy of carbon ( $E_f^C$ ) in pure Ni and Ni-M (M represent Ti, Cr) systems, the binding energy ( $E_b^{M-C}$ ) of carbon in Ni-M systems.

| n | $E_f^C/\text{eV}$ | $E_f^C(E_b^{M-C})/\text{eV}$ |              |
|---|-------------------|------------------------------|--------------|
|   | Ni-nC             | Ni-Ti-nC                     | Ni-Cr-nC     |
| 1 | 0.74              | 1.06 (0.32)                  | 0.67 (-0.07) |
| 2 | 0.83              | 1.07 (0.65)                  | 0.72 (-0.05) |
| 3 | 0.93              | 1.09 (1.04)                  | 0.73 (-0.03) |

3. The 1NN carbon binding energy as a function of metal solute size factor in the C-M-Ni systems.

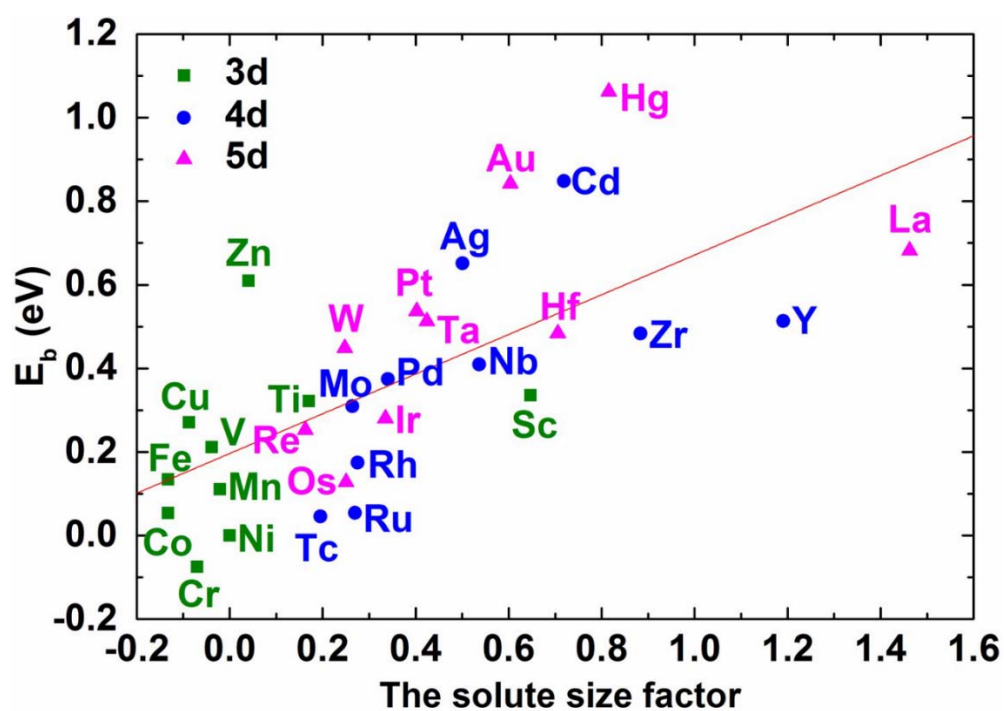

Fig. S1. The C-M-Ni binding energy for carbon at 1NN as a function of the metal solute size factor.

4. The PDOS for C and Ni atom in C-Ni system.

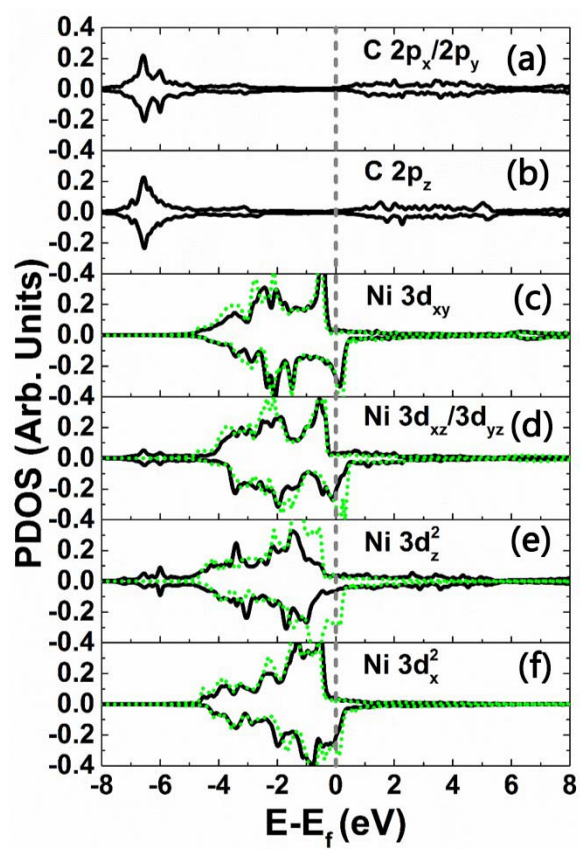

**Fig. S2.** PDOS for C and Ni atom in C-Ni system. The Fermi level is fixed at 0 eV (the dashed gray line). The PDOS of pure Ni system is also indicated by the dashed green line for a comparison.
